# Supplementary material for: Functional reconstitution of plant plasma membrane H+-ATPase into giant unilamellar vesicles
Source: Springer Nature journal article supplement (doi:10.1038/s41598-025-92663-9), 2025-03-12
Supplement: MOESM1 [file 41598_2025_92663_MOESM1_ESM.pdf]

## SUPPLEMENTARY INFORMATION II - SOURCE DATA

### Functional reconstitution of plant plasma membrane H<sup>+</sup>-ATPase into giant unilamellar vesicles

Huriye D. Uzun<sup>1,2</sup>, Ekaterina Malysenko<sup>1</sup>, Bo H. Justesen<sup>1</sup> and Thomas Günther Pomorski<sup>1,2,\*</sup>

<sup>1</sup>Department of Molecular Biochemistry, Faculty of Chemistry and Biochemistry, Ruhr University Bochum, Bochum, Germany

<sup>2</sup>Department of Plant and Environmental Sciences, University of Copenhagen, Frederiksberg, Denmark

#### \*Author for correspondence

Thomas Günther Pomorski

Tel: +49 2343224430

Email address: [thomas.guenther-pomorski@ruhr-uni-bochum.de](mailto:thomas.guenther-pomorski@ruhr-uni-bochum.de)

#### Figure 1B:

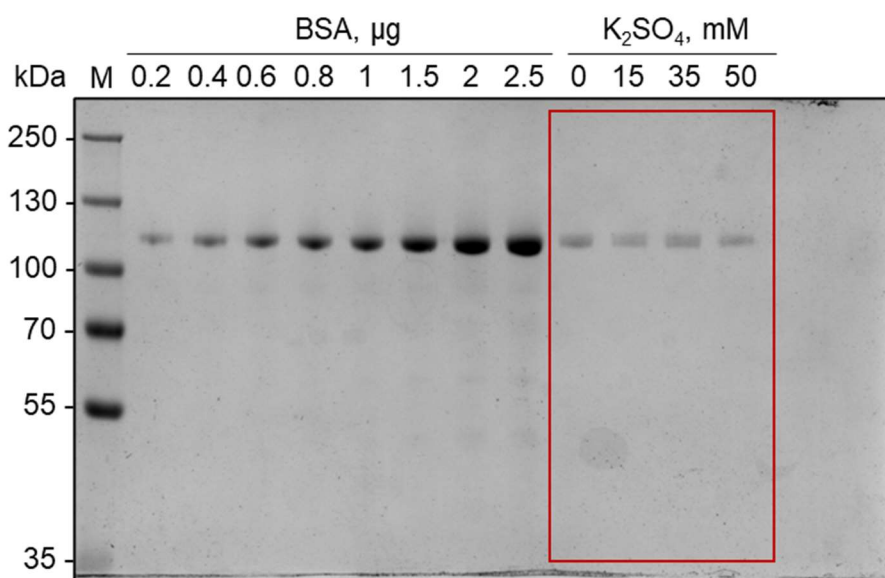

Coomassie Blue-stained SDS-PAGE gel of AHA2 reconstituted in proteoliposomes (PL) at the indicated ion concentrations and varying amounts of BSA. The gel runs against the PageRuler™ Plus Prestained Protein Ladder, 10 to 250 kDa.

**Figure 2B:**

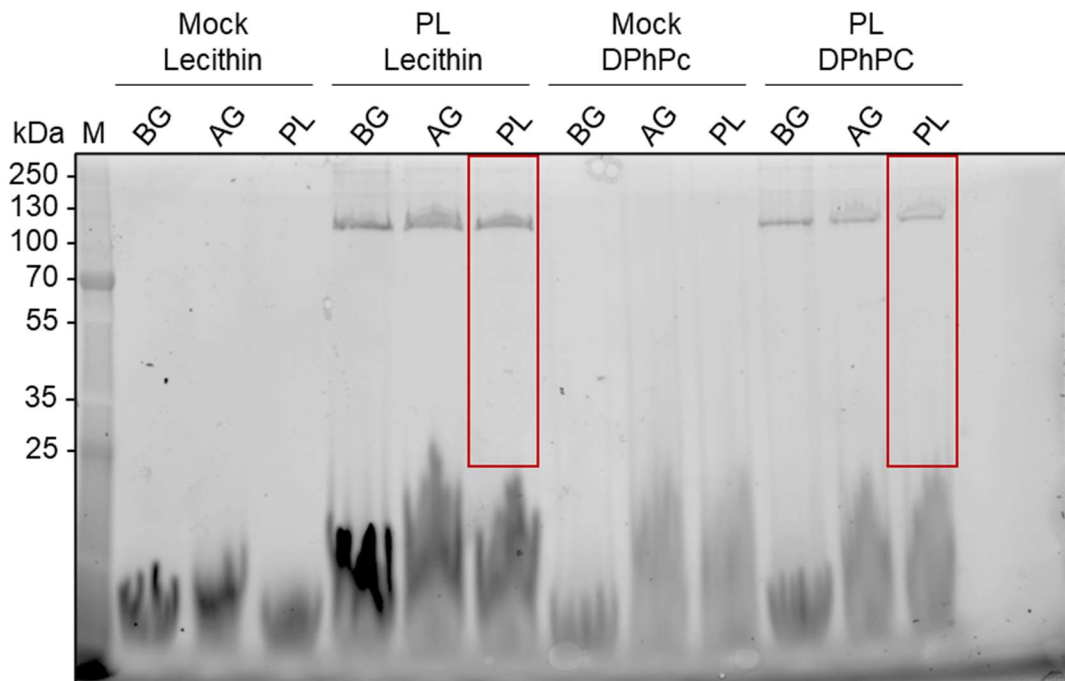

Coomassie Blue-stained SDS-PAGE gel of AHA2 reconstituted in proteoliposomes (PL) containing the indicated lipids and a protein-free control sample (Mock). During the reconstitution, samples were taken after mixing LUVs, H<sup>+</sup> pump, and detergent (BG), and the reconstitution mixture was run through a G50 column (AG), followed by incubation with Bio-Beads (PL) to remove the detergent. The gel runs against the PageRuler™ Plus Prestained Protein Ladder, 10 to 250 kDa.

**Figure 2F:**

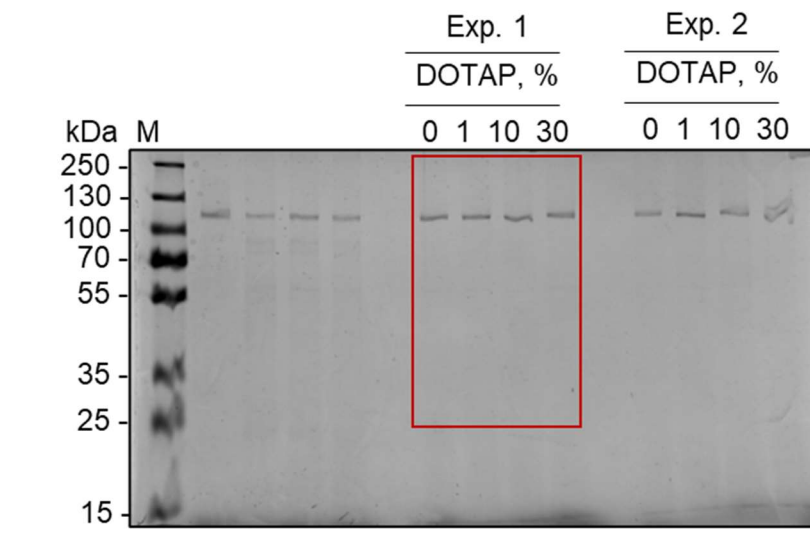

Coomassie Blue-stained SDS-PAGE gel of AHA2 reconstituted in proteoliposomes containing different molar ratios of DOTAP lipid. Two sets of experiments were loaded on the gel. The gel runs against the PageRuler™ Plus Prestained Protein Ladder, 10 to 250 kDa.

**Suppl. Figure S1B:**

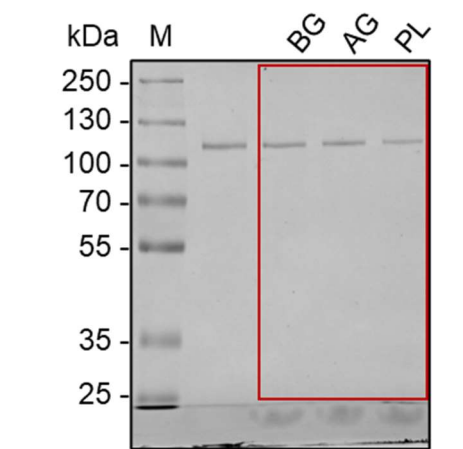

**Suppl. Figure S2A:**

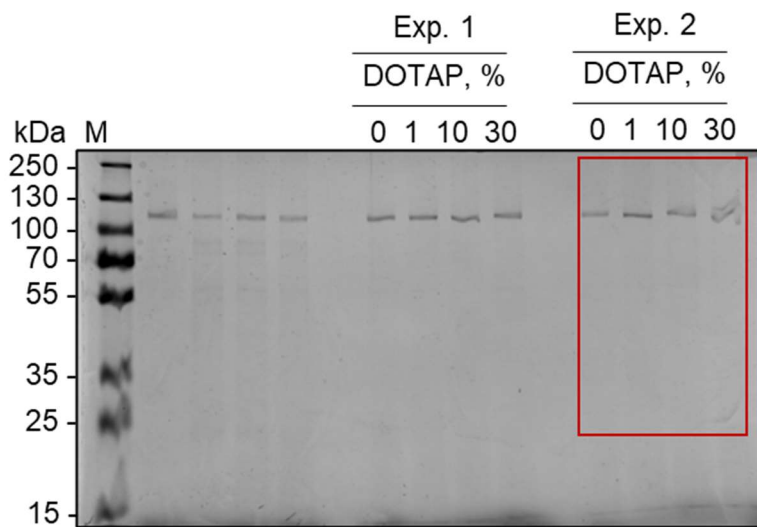

Coomassie Blue-stained SDS-PAGE gel of AHA2 reconstituted in proteoliposomes containing different molar ratios of DOTAP lipid. Two sets of experiments were loaded on the gel. The gel runs against the PageRuler™ Plus Prestained Protein Ladder, 10 to 250 kDa.

**Suppl. Figure S3A:**

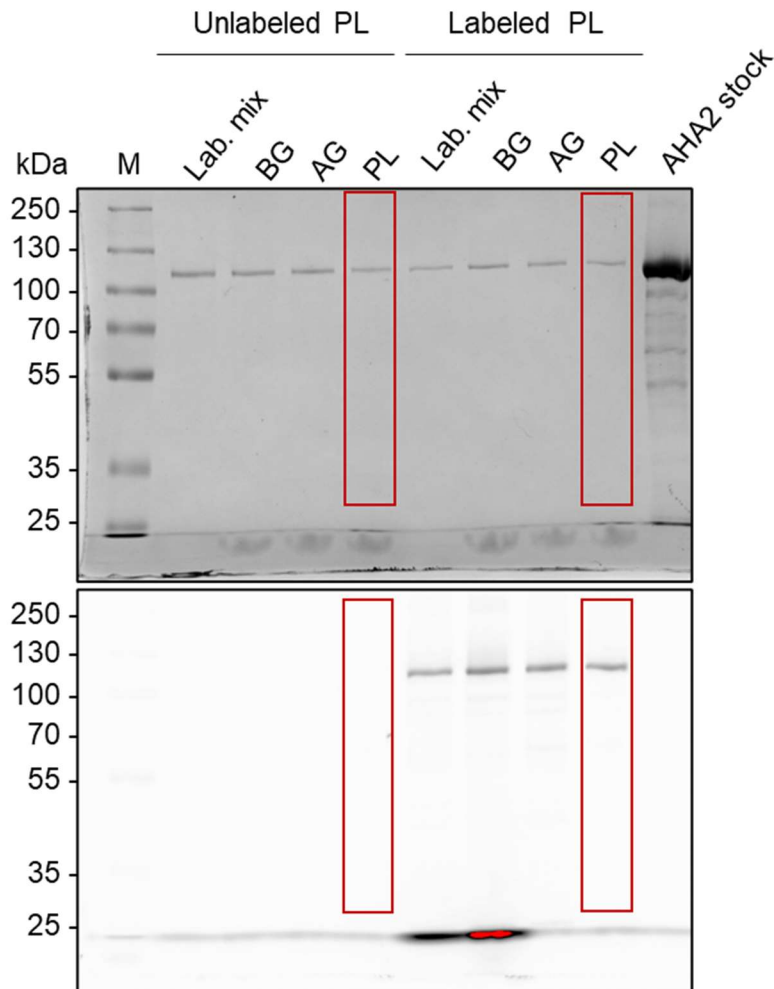

Upper panel: Coomassie Blue-stained SDS-PAGE gel of unlabeled and labeled AHA2 reconstituted in proteoliposomes (PL). During the reconstitution, samples were taken after mixing the H<sup>+</sup> pump with the label (lab. mix), then after mixing labeled or unlabeled H<sup>+</sup> pump, LUVs, and detergent (BG). The reconstitution mixture was run through a G50 column (AG), followed by incubation with Bio-Beads (PL) to remove the detergent. The gel runs against the PageRuler™ Plus Prestained Protein Ladder, 10 to 250 kDa.

Lower panel: Alexa647 scan of SDS-PAGE gel of unlabeled and labeled AHA2 reconstituted in PL.
